# Supplementary material
Source: PubMed Central journal article supplement (PMC3679489)
Supplement: NIHMS48415-supplement-01.pdf [file NIHMS48415-supplement-01.pdf]

## SUPPLEMENTAL MATERIAL 1

### Characteristics of Study Population at Recruitment

We evaluated the type and number of symptoms for which women underwent laparoscopy, and pelvic pain severity. Symptom types were: 1) pelvic pain without subfertility; 2) pelvic pain with subfertility; 3) subfertility without pelvic pain; and 4) no pelvic pain or subfertility. Because some symptoms (e.g., pelvic pain and dysmenorrhoea) are strongly correlated, principal-component analysis was used to identify underlying patterns. Using the principal axis method (1) with prior communality estimates of “1” and orthogonal rotation, we extracted factors (symptom patterns) and retained those with eigenvalues >1. A symptom was deemed to load onto a factor if its component loading was >0.40 for that pattern and ≤0.40 for the others. The mean number of individual symptoms within each factor was then compared across outcome groups. Pelvic pain severity was assigned by women as a numeric rating scale score (on a 1–10 scale).

### The Care-Seeking Experience

Diagnostic delay (interval between symptom onset and laparoscopy) was compared across outcome groups. The age of a woman at symptom onset was derived as the average of her reported ages at onset of all the symptoms she reported. The influence of health care funding, type and number of symptoms, and pelvic pain severity was explored in multivariate analyses.

## SUPPLEMENTAL MATERIAL 2

Mean dimension scores in case and sterilization/symptomatic control subjects were compared, with adjustment for relevant covariates.

## SUPPLEMENTAL MATERIAL 3

Absenteeism and presenteeism were calculated as [(hours missed due to symptoms)/(hours missed due to symptoms + hours actually worked)] and reduced productivity while working, respectively, both expressed as percentages. Overall productivity loss was calculated as [(hours missed due to symptoms + (percent reduced productivity while working × hours actually worked))/(hours missed due to symptoms + hours actually worked)] × 100.

## SUPPLEMENTAL MATERIAL 4

Principal-component analysis resulted in four categories of presenting complaints: “pelvic,” “bowel,” “urinary,” and “pelvic mass” (Supplemental Table 1). Affected women reported more individual symptoms in all categories ( $P < .001$ ) (Table 1).

## SUPPLEMENTAL MATERIAL 5

Notably, even after adjusting for site, education, marital status, employment status, pelvic pain severity, type and number of presenting symptoms, and comorbidity, health-related quality of life in the domains of bodily pain ( $P = .026$ ) and health perception ( $P < .001$ ) and the PCS score ( $P = .009$ ) fell as rAFS disease severity increased.

## SUPPLEMENTAL MATERIAL 6

Most women were in paid or self-employment (77.2%, 95% CI 74.8–79.7%); those not working were mostly housewives or care givers. One in seven symptomatic unemployed women (14.5%, 95% CI 10.5–18.6%) were not working because of their original complaints.

## REFERENCE

1. Jolliffe IT. Principal component analysis. New York: Springer-Verlag; 1986.

## SUPPLEMENTAL FIGURE 1

Participating centers and numbers of women recruited in the Global Study of Women's Health (n = 1,418).

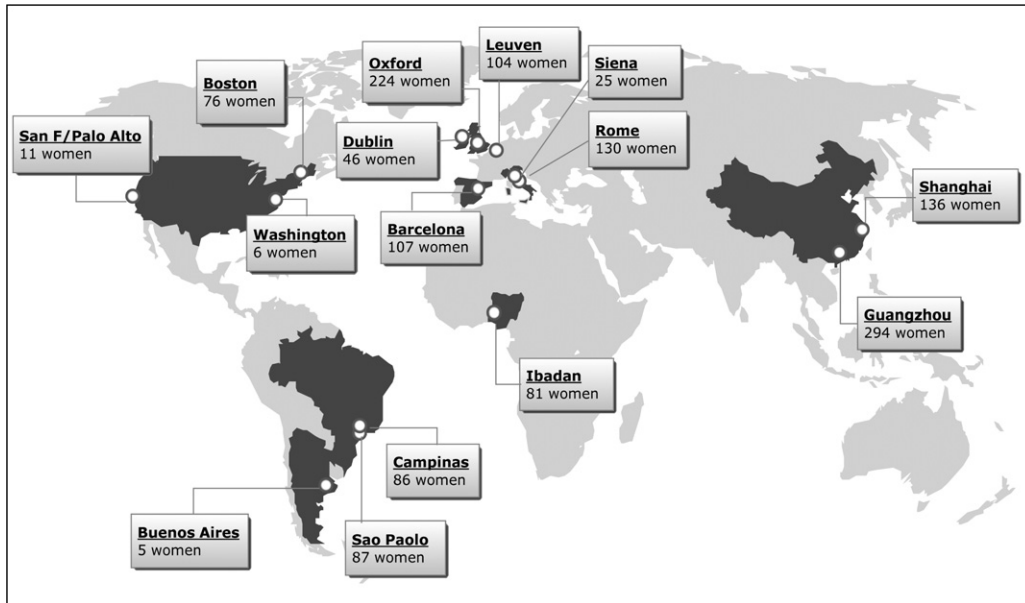

Nnoaham. Endometriosis, quality of life and work. *Fertil Steril* 2011.

## SUPPLEMENTAL FIGURE 2

Proportions of diagnostic endometriosis incidence and stage by center of recruitment. Others comprises Buenos Aires, Washington, DC, San Francisco, and Palo Alto.

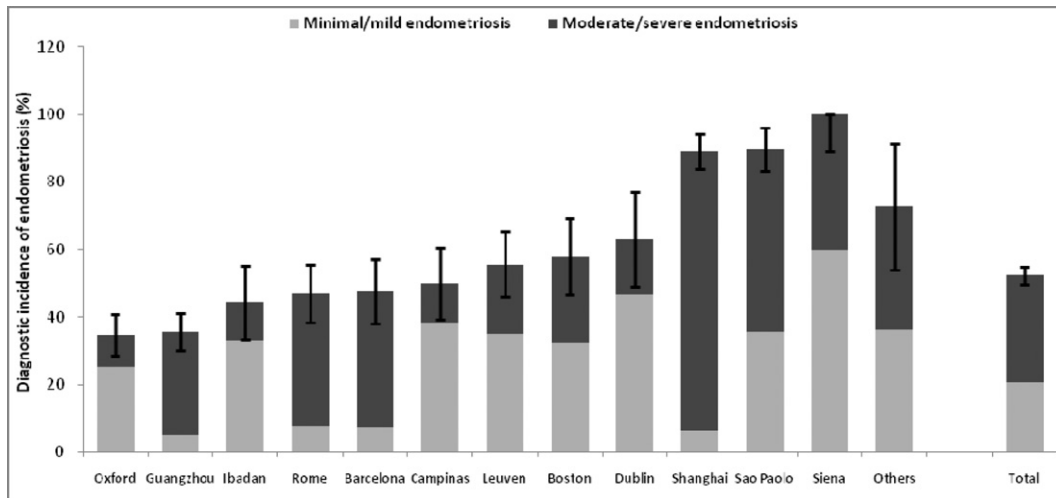

Nnoaham. Endometriosis, quality of life and work. *Fertil Steril* 2011.

### SUPPLEMENTAL FIGURE 3

Health-related quality of life in women with endometriosis (n = 745), symptomatic control women (n = 587), and laparoscopic sterilization control women (n = 86): SF36v2 component summary scores with adjusted P values and 95% confidence intervals. A lower score means lower health-related quality of life. P values are presented as (P=x; P=y), x being the P value for comparison of endometriosis and laparoscopic sterilization control subjects and y being the P value for comparison of endometriosis and symptomatic control subjects. Dashed line represents mean component summary score (50) for normative population. All P values are adjusted for site, education, marital status, employment status, pelvic pain severity, type and number of presenting symptoms, and comorbidity.

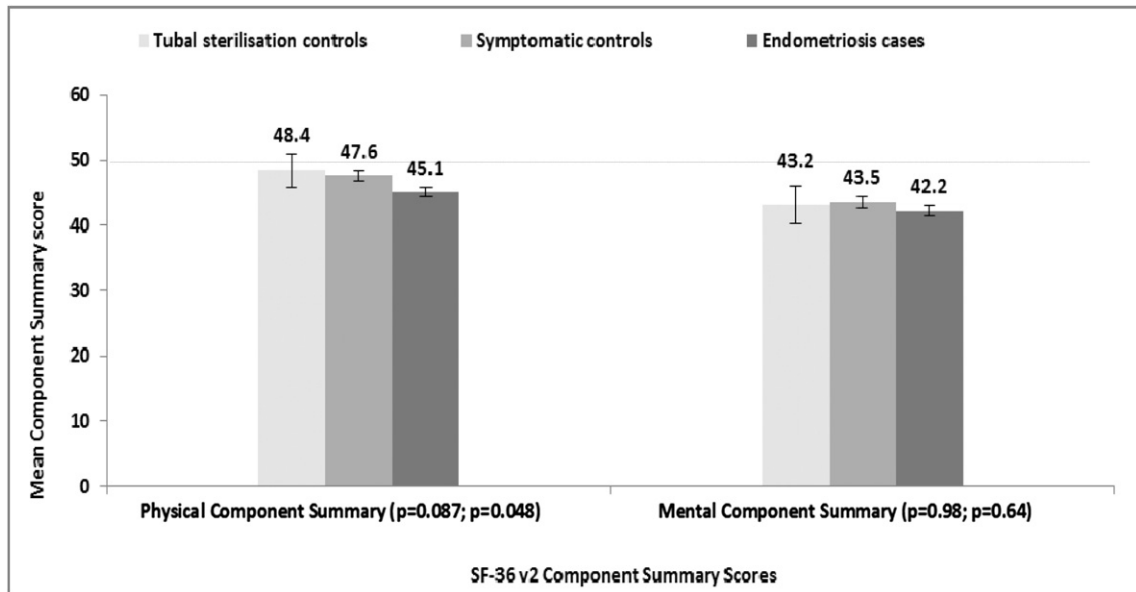

Nnoaham. Endometriosis, quality of life and work. *Fertil Steril* 2011.

## SUPPLEMENTAL FIGURE 4

Absenteeism, presenteeism, and overall work productivity loss by endometriosis severity (Revised American Fertility Society classification [rAFS]). Adjusted *P* values for the association between each work productivity dimension and rAFS disease stage (trend test) are given. Variables adjusted for included educational attainment, marital status, type and number of symptoms, severity of pelvic pain, and comorbidity.

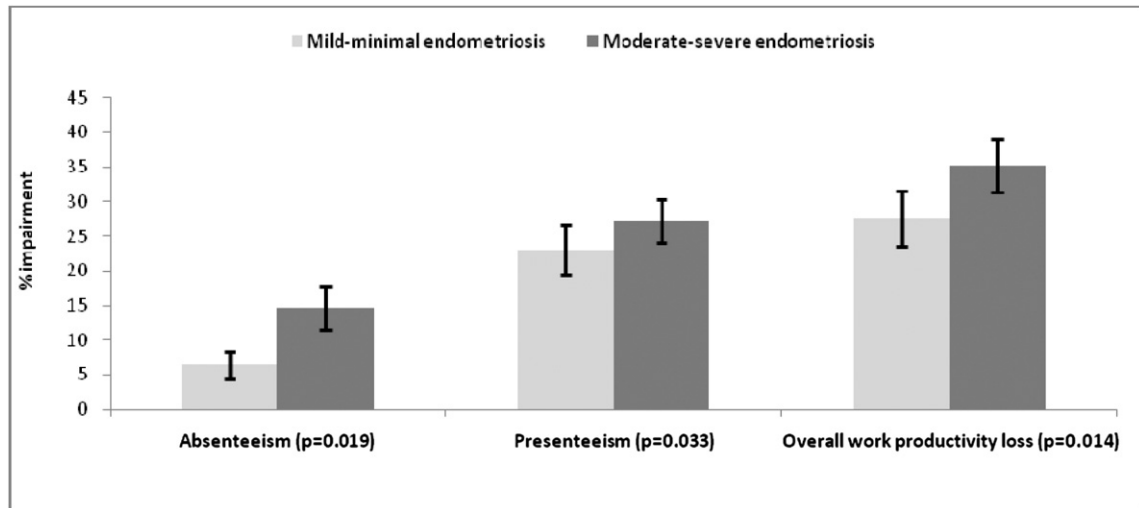

Nnoaham. Endometriosis, quality of life and work. *Fertil Steril* 2011.

## SUPPLEMENTAL FIGURE 5

Monetary loss from endometriosis-associated work absenteeism and presenteeism.

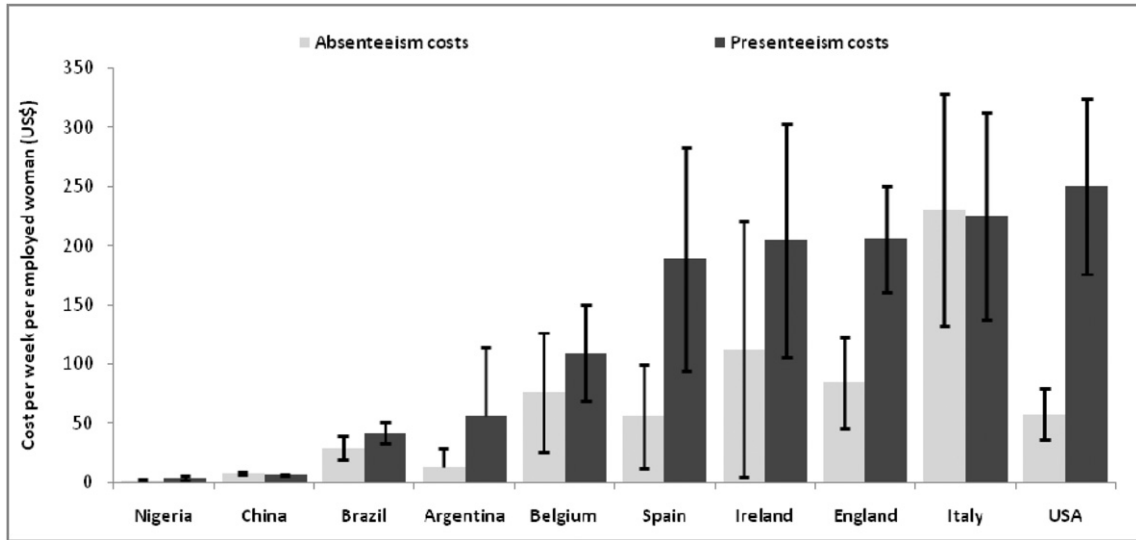

Nnoaham. Endometriosis, quality of life and work. *Fertil Steril* 2011.

**SUPPLEMENTAL TABLE 1****Factors (symptom patterns) and loading symptom variables.**

| <b>“Pelvic” symptoms</b>                                                       | <b>“Bowel” symptoms</b>                                      | <b>“Urinary” symptoms</b>                                         | <b>“Pelvic mass” symptoms</b>                 |
|--------------------------------------------------------------------------------|--------------------------------------------------------------|-------------------------------------------------------------------|-----------------------------------------------|
| Chronic pelvic pain<br>Painful periods<br>Painful intercourse<br>Heavy periods | Painful bowel opening<br>Bloody bowel opening<br>Bowel upset | Pain on passing urine<br>Blood in urine<br>Other urinary problems | Pelvic mass<br>Ovarian cyst<br>Not subfertile |

*Nnoaham. Endometriosis, quality of life and work. Fertil Steril 2011.*

**SUPPLEMENTAL TABLE 2****Care-seeking for symptoms, mean (SD).**

| <b>Variables</b>                                                    | <b>Endometriosis<br/>(n = 745)</b> | <b>Symptomatic<br/>control (n = 587)</b> | <b>Unadjusted<br/>P value</b> |
|---------------------------------------------------------------------|------------------------------------|------------------------------------------|-------------------------------|
| Age at symptom onset (y)                                            | 25.9 (7.6)                         | 27.2 (7.3)                               | .0063                         |
| Age at first contact with general<br>physician for symptoms (y)     | 26.2 (7.9)                         | 27.6 (7.4)                               | .0016                         |
| No. of visits to general physician before<br>referral to specialist | 6.5 (10.2)                         | 6.8 (10.6)                               | .59                           |
| Age at diagnosis (y)                                                | 32.6 (6.2)                         | 33.1 (6.4)                               | .10                           |
| Diagnostic delay (y)                                                | 6.7 (6.3)                          | 5.9 (6.0)                                | .017                          |

*Nnoaham. Endometriosis, quality of life and work. Fertil Steril 2011.*
